# Supplementary material for: Proton-conducting metal–organic frameworks with linkers containing anthracenyl and sulfonate groups
Source: Royal Society of Chemistry journal article supplement (doi:10.1039/d2ce00747a), 2022-01-01
Supplement: d2ce00747a1.pdf [file d2ce00747a1.pdf]

# Proton-Conducting Metal-Organic Frameworks with Linkers Containing Anthracenyl and Sulfonate Groups

Tsai-En Ho, Amitabha Datta, and Hon Man Lee\*

Department of Chemistry, National Changhua University of Education, Changhua 500, Taiwan

## Table of Contents

---

|   |                                    |     |
|---|------------------------------------|-----|
| 1 | Experimental Procedure             | S2  |
| 2 | Crystallographic Data              | S5  |
| 3 | Geometric Parameters of Structures | S5  |
| 4 | XRD Patterns                       | S7  |
| 5 | IR Spectra                         | S7  |
| 6 | TGA Curves                         | S8  |
| 7 | Durability Tests                   | S9  |
| 8 | Arrhenius Plots                    | S9  |
| 9 | References                         | S10 |

---

## Experimental Section

**General Information.** All starting compounds were acquired from chemical suppliers and used directly without further treatment. All solvents were purified by standard drying methods. The dia ligand was synthesized by a reported procedure.<sup>1</sup> Infrared spectra were measured from a Bio-Rad FTS-185 infra-red spectrophotometer. TGA was carried out on a Perkin-Elmer Pyris 6 TG and a Mettler-Toledo 2-HT thermal analyzers under the same conditions of a heating rate of 20 °C min<sup>-1</sup> and a N<sub>2</sub> gas flow rate of 20 mL min<sup>-1</sup>. PXRD analyses were performed on a Shimadzu Lab-X XRD-6000 diffractometer with CuK $\alpha$  radiation ( $\lambda = 1.54060 \text{ \AA}$ ).

**Synthesis of Co(dia)<sub>1.5</sub>(Hsip)(H<sub>2</sub>O)·H<sub>2</sub>O (1).** A mixture of dia (0.10 g, 0.322 mmol), Co(NO<sub>3</sub>)<sub>2</sub>·6H<sub>2</sub>O (0.096 g, 0.322 mmol), and 5-sulfoisophthalic acid monosodium salt (0.086 g, 0.322 mmol) in 10 mL of D.I. H<sub>2</sub>O was placed in a 20 mL Teflon container. The vessel was sealed and allowed to heat up to 140 °C in 2 h. This temperature was maintained for 48 h. Afterwards, the vessel was cooled down to 40 °C in 24 h. The red crystals formed were filtered and flushed with D.I. H<sub>2</sub>O, CH<sub>3</sub>OH, acetone, and DMF. They were then allowed to dry in air. Yield: 89 mg (52%). Anal. Calc. for C<sub>38</sub>H<sub>29</sub>N<sub>6</sub>O<sub>9</sub>SCo: C, 56.72; H, 3.63; N, 10.44%. Found: C, 56.90; H, 3.71; N, 10.62%. IR (KBr disk, cm<sup>-1</sup>): 3478, 3117, 1695, 1621, 1599, 1564, 1502, 1440, 1413, 1401, 1362, 1327, 1317, 1253, 1228, 1189, 1164, 1158, 1102, 1084, 1040, 999, 939, 913, 867, 851, 839, 814, 799, 764, 741, 680, 655, 641, 610, 577, 550, 525, 490, 437, 416.

**Zn<sub>2</sub>( $\mu$ -OH)(dia)<sub>2</sub>(sip)·2H<sub>2</sub>O (2).** A procedure similar to that of compound of **1** was used. A mixture of dia (0.10 g, 0.322 mmol), Zn(NO<sub>3</sub>)<sub>2</sub>·6H<sub>2</sub>O (0.29 g, 1.220 mmol), and 5-sulfoisophthalic acid monosodium salt (0.0864 g, 0.322 mmol) was used. Orange crystals were obtained. Yield: 66 mg, 39%. Anal. Calc. for C<sub>48</sub>H<sub>35</sub>N<sub>8</sub>O<sub>10</sub>SZn<sub>2</sub>: C, 55.08; H, 3.37; N, 10.71%. Found: C, 55.10; H, 3.57; N, 10.55%. IR (KBr disk, cm<sup>-1</sup>): 3472, 3117, 1619, 1572, 1510, 1438, 1415, 1380, 1339, 1322, 1249, 1224, 1199, 1160, 1106, 1082, 1038, 948, 915, 911, 853, 779, 766, 736, 725, 684, 655, 624, 585, 579, 548, 462, 418.

**Single-Crystal X-ray Diffraction Analyses.** Structural data of **1** was acquired from a Bruker D8 VENTURE with a PHOTON 100 CMOS detector; structure data of **2** was obtained from a Bruker APEX II with a CCD area detector. Data acquisition was carried out at 150(2) K employing MoK $\alpha$  radiation ( $\lambda = 0.71073$  Å) from a sealed X-ray tube. Unit cell parameters were refined by least-squares method. Data acquisition and reduction were carried out using the Bruker APEX and SAINT softwares.<sup>2</sup> Multi-scan method implemented in SADABS was performed for absorption corrections.<sup>3</sup> Direct methods were utilized to solve the structures which were then refined by full-matrix least squares methods against  $F^2$  using the SHELXL program.<sup>4</sup> All non-H atoms were refined in anisotropic manners. All H atoms were fixed at calculated positions and then riding refinements were performed. CCDC file numbers are 2113874 (**1**) and 2113875 (**2**).

**Proton Conductivity Measurement.** The powder sample was pressed under a pressure of 3,550 kg cm<sup>-2</sup> for 120 sec to form a pellet, the thickness of which was recorded by a micrometer. Copper

wires were glued to both sides of the pellet using silver paste. Then the proton conductivities of the sample were measured with a four-probe setup by the AC impedance spectroscopy. Two sets of experiments were performed. One was tested at 30 °C while humidity levels were varied between 65 and 98% RH. The other was tested at temperatures varying from 40 to 85 °C with humidity levels kept at 98% RH. For acquiring the impedance data at diverse RH and temperatures, the sample were first equilibrated at diverse RH for at least 18 h at 298 K and then were equilibrated at desired temperature for another 5 hours before measurement. The humidity and temperature were controlled by a humidity-controlled oven. The impedance measurements were recorded on a Zahner Zennium-E4 with tuned frequencies of 0.1- 1 MHz and an alternating potential of 500 mV at 308-358 K. Data was collected using THALES USB software. The bulk conductivities ( $\sigma$ ,  $S\text{ cm}^{-1}$ ) of the sample were calculated from

the equation:  $\sigma = \frac{L}{RA}$  where  $L$  (cm) is the sample's thickness,  $R$  ( $\Omega$ ) is the resistance estimated from the semicircular arc of the Nyquist plot, and  $A$  ( $\text{cm}^2$ ) is the sample's face area ( $A = \text{thickness} \times \text{width}$ ).

The Arrhenius plots of  $\log(\sigma T)$  vs  $1000/T$  are linear and feasibly be fitted to the equation

$\sigma T = \sigma_0 \exp\left(-\frac{E_a}{kT}\right)$ , where  $\sigma_0$  is a pre-exponential factor;  $E_a$  is the apparent activation energy for conduction;  $k$  is the Boltzmann's constant; and  $T$  is the absolute temperature.

**Table S1.** Crystallographic Data

|                                                               | 1                                                                                      | 2                                                                                                     |
|---------------------------------------------------------------|----------------------------------------------------------------------------------------|-------------------------------------------------------------------------------------------------------|
| empirical formula                                             | C <sub>38</sub> H <sub>27</sub> CoN <sub>6</sub> O <sub>8</sub> S·<br>H <sub>2</sub> O | C <sub>48</sub> H <sub>32</sub> N <sub>8</sub> O <sub>8</sub> SZn <sub>2</sub> ·<br>2H <sub>2</sub> O |
| formula weight                                                | 804.66                                                                                 | 1047.65                                                                                               |
| crystal system                                                | triclinic                                                                              | monoclinic                                                                                            |
| space group                                                   | <i>P</i> $\bar{1}$                                                                     | <i>P</i> 2 <sub>1</sub> / <i>n</i>                                                                    |
| <i>a</i> , Å                                                  | 9.1899(7)                                                                              | 10.9944(9)                                                                                            |
| <i>b</i> , Å                                                  | 11.1150(8)                                                                             | 22.1650(18)                                                                                           |
| <i>c</i> , Å                                                  | 19.4654(15)                                                                            | 18.7012(14)                                                                                           |
| $\alpha$ , deg                                                | 100.329(3)                                                                             | 90                                                                                                    |
| $\beta$ , deg                                                 | 94.053(3)                                                                              | 90.251(6)                                                                                             |
| $\gamma$ , deg                                                | 113.601(3)                                                                             | 90                                                                                                    |
| <i>V</i> , Å <sup>3</sup>                                     | 1769.9(2)                                                                              | 4557.3(6)                                                                                             |
| <i>T</i> , K                                                  | 150(2)                                                                                 | 150(2)                                                                                                |
| <i>Z</i>                                                      | 2                                                                                      | 4                                                                                                     |
| F(000)                                                        | 828                                                                                    | 2144                                                                                                  |
| no. of unique data                                            | 7698                                                                                   | 8391                                                                                                  |
| no. of params refined                                         | 497                                                                                    | 623                                                                                                   |
| <i>R</i> <sub>1</sub> <sup>a</sup> [ <i>I</i> > 2σ <i>I</i> ] | 0.0310                                                                                 | 0.0649                                                                                                |
| <i>wR</i> <sub>2</sub> <sup>b</sup> (all data)                | 0.0793                                                                                 | 0.1693                                                                                                |

$$^a R_1 = \sum(|F_o| - |F_c|) / \sum |F_o|. \quad ^b wR_2 = [\sum(|F_o|^2 - |F_c|^2)^2 / \sum (F_o^2)]^{1/2}$$

**Table S2.** Selected Bond length (Å) and Angles (°) in **1**

|             |            |             |            |
|-------------|------------|-------------|------------|
| Co1—O2      | 2.1288(11) | Co1—N1      | 2.1355(13) |
| Co1—O7#1    | 2.0832(11) | Co1—N3      | 2.1059(13) |
| Co1—O8      | 2.1192(11) | Co1—N5      | 2.1279(13) |
| N1—Co1—N5   | 89.37(5)   | N5—Co1—O7#1 | 93.49(5)   |
| N1—Co1—O7#1 | 93.49(5)   | O7#1—Co1—O8 | 92.12(5)   |
| N1—Co1—O8   | 84.13(5)   | O8—Co1—O2   | 90.26(4)   |
| N1—Co1—O2   | 90.85(5)   | O2—Co1—N5   | 84.38(5)   |
| N3—Co1—N5   | 91.49(5)   | N1—Co1—N3   | 178.51(5)  |
| N3—Co1—O7#1 | 87.32(5)   | N5—Co1—O8   | 171.52(5)  |
| N3—Co1—O2   | 90.45(5)   | O2—Co1—O7#1 | 176.87(4)  |
| N3—Co1—O8   | 95.13(5)   |             |            |

#1 x+1, y+1, z

**Table S3.** Selected Bond length (Å) and Angles (°) in **2**

|            |            |           |            |
|------------|------------|-----------|------------|
| Zn1—O1     | 1.904(4)   | Zn1—O2    | 1.948(4)   |
| Zn1—N1     | 1.989(5)   | Zn1—N4    | 2.007(5)   |
| Zn2—O1     | 1.919(4)   | Zn2—O4    | 1.950(4)   |
| Zn2—N5     | 1.973(5)   | Zn2—N8    | 1.985(5)   |
| O2—Zn1—N1  | 107.9(2)   | O1—Zn1—N1 | 109.79(19) |
| O2—Zn1—N4  | 109.96(19) | O2—Zn1—O1 | 103.02(18) |
| O1—Zn1—N4  | 109.96(19) | N1—Zn1—N4 | 117.1(2)   |
| Zn1—O1—Zn2 | 124.2(2)   |           |            |
| N8—Zn2—O4  | 113.12(19) | N8—Zn2—O1 | 112.14(19) |
| N8—Zn2—N5  | 115.3(2)   | N5—Zn2—O1 | 107.73(19) |
| N5—Zn2—O4  | 112.20(19) | O1—Zn2—O4 | 94.39(17)  |

**Table S4.** Hydrogen Bonds in **1**

| D—H      | d(D-H) | d(H···A) | <DHA  | d(D···A)   | A                |
|----------|--------|----------|-------|------------|------------------|
| O10—H10B | 0.87   | 2.53     | 139.1 | 3.2376(16) | O7 [x+1, y+1, z] |
| O10—H10B | 0.87   | 2.30     | 146.1 | 3.0608(16) | O1 [x, y+1, z]   |
| O8—H8B   | 0.87   | 2.09     | 148.0 | 2.8624(17) | O5 [x+1, y, z]   |
| O8—H8A   | 0.87   | 1.93     | 136.1 | 2.6280(17) | O6 [x+1, y+1, z] |
| O4—H4A   | 0.84   | 1.83     | 165.9 | 2.6545(16) | O3 [x-1, y, z]   |

**Table S5.** Hydrogen Bonds in **2**

| D—H          | d(D-H) | d(H···A) | <DHA  | d(D···A) | A                           |
|--------------|--------|----------|-------|----------|-----------------------------|
| O(10)—H(10B) | 0.85   | 2.11     | 171.6 | 2.951(8) | O(2) [x-1/2, -y+1/2, z+1/2] |
| O(10)—H(10A) | 0.85   | 2.17     | 145.9 | 2.912(8) | O(9) [x-1, y, z]            |
| O(9)—H(9B)   | 0.85   | 2.06     | 158.5 | 2.864(6) | O(7) [x+1, y, z]            |
| O(9)—H(9A)   | 0.85   | 2.23     | 123.8 | 2.797(7) | O(5) [x+1/2, -y+1/2, z+1/2] |
| O(1)—H(1)    | 0.95   | 2.06     | 132.6 | 2.792(6) | O(8) [x+1/2, -y+1/2, z-1/2] |

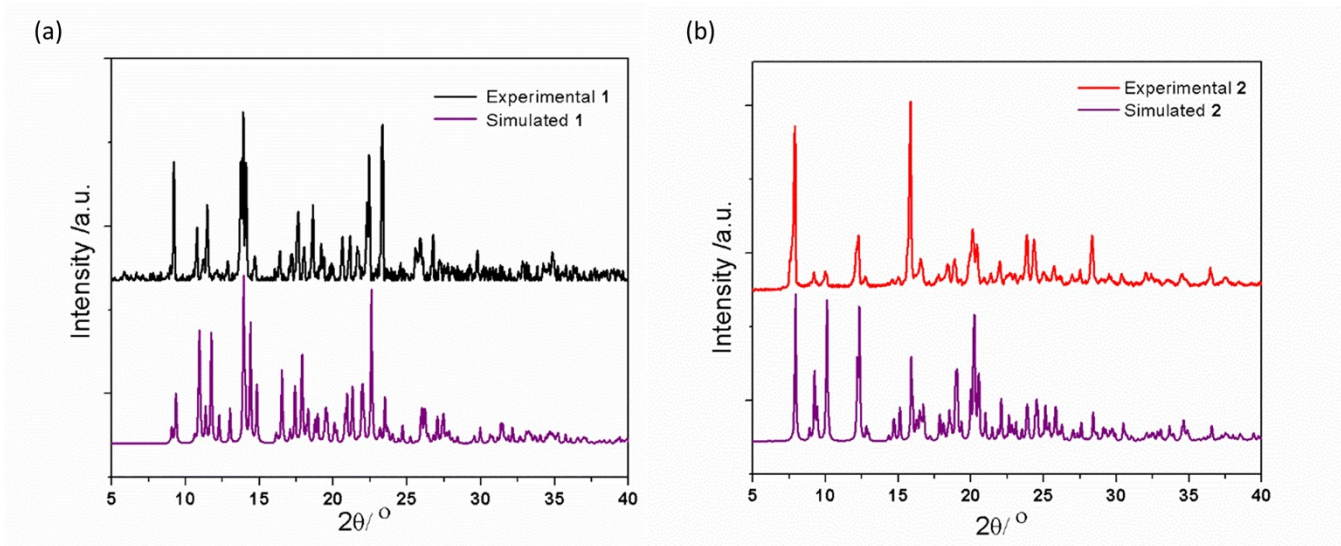

**Figure S1.** Powder X-ray Diffraction Patterns of **1** and **2**.

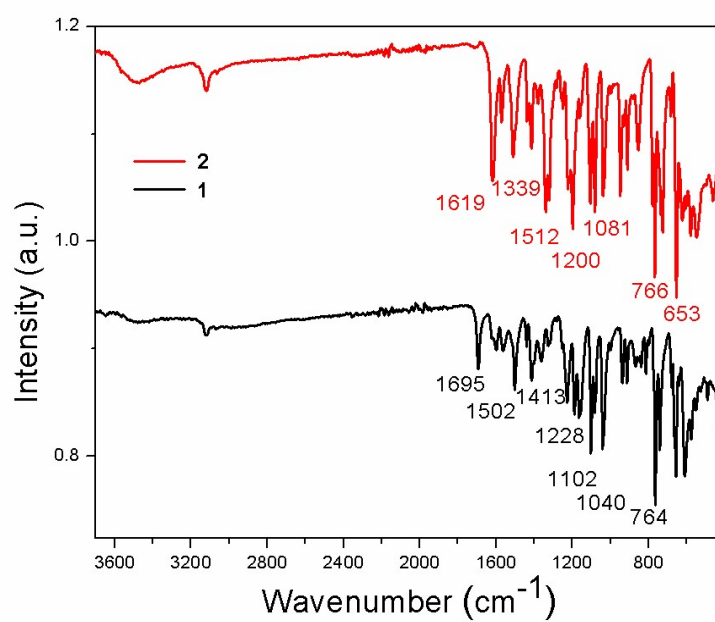

**Figure S2.** Infrared Spectra of **1** and **2**.

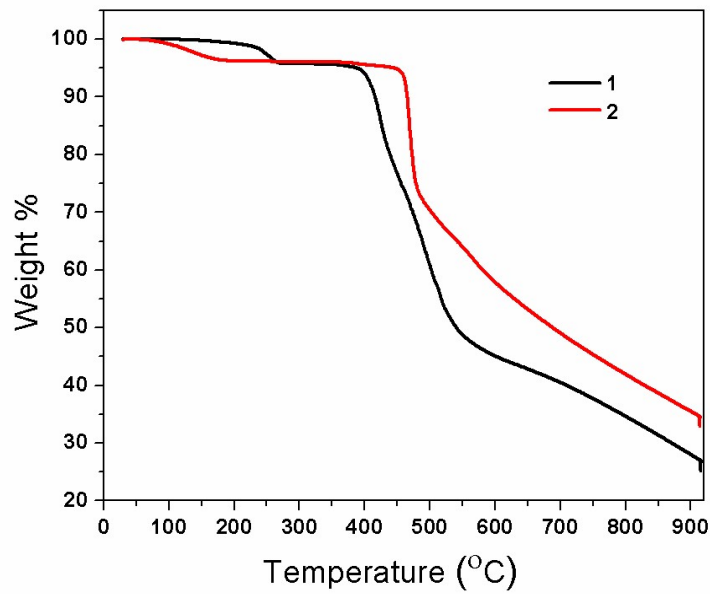

Figure S3A. TGA Curves of 1 and 2 (obtained from a Perkin-Elmer Pyris 6 TG analyzer).

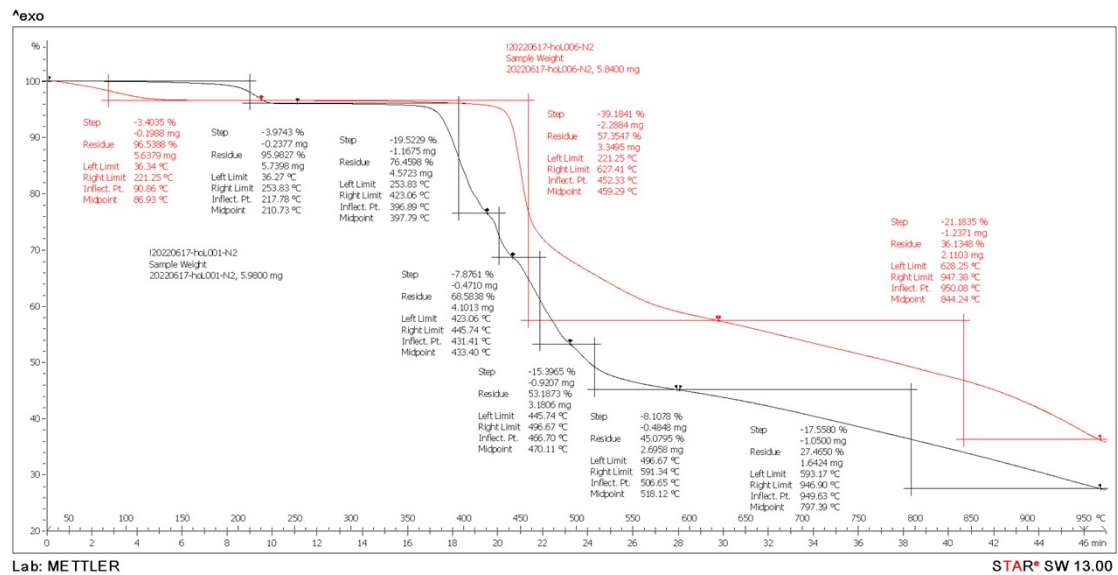

Figure S3B. TGA Curves of 1 (black curve) and 2 (red curve) (obtained from a Mettler-Toledo thermal analyzer).



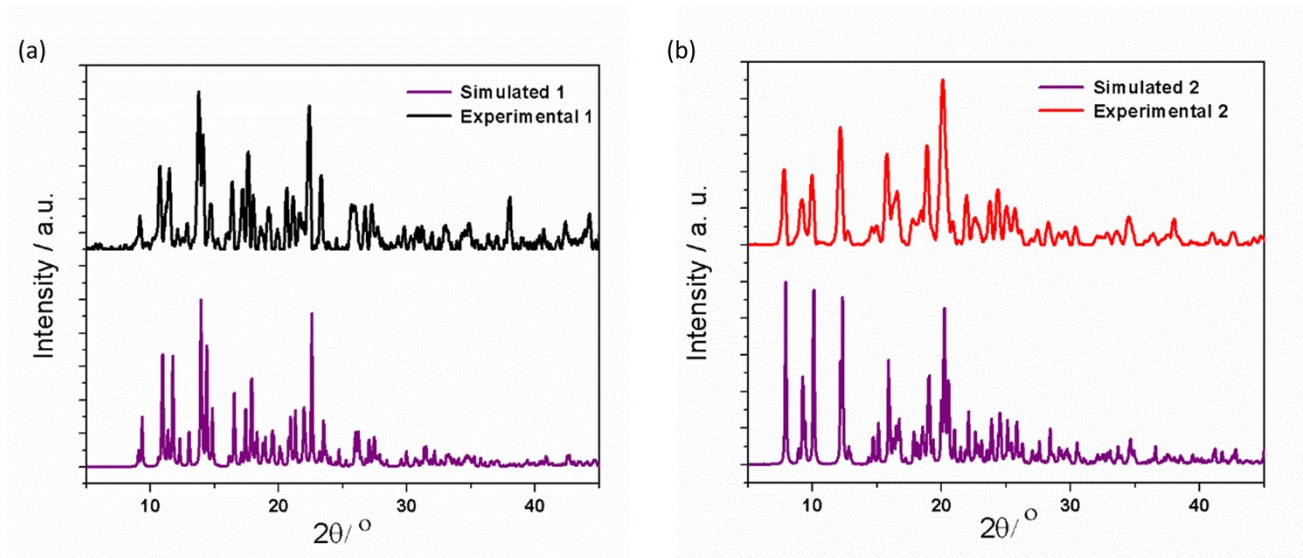

**Figure S4.** The PXR D patterns after 10-day proton conductivity measurements.

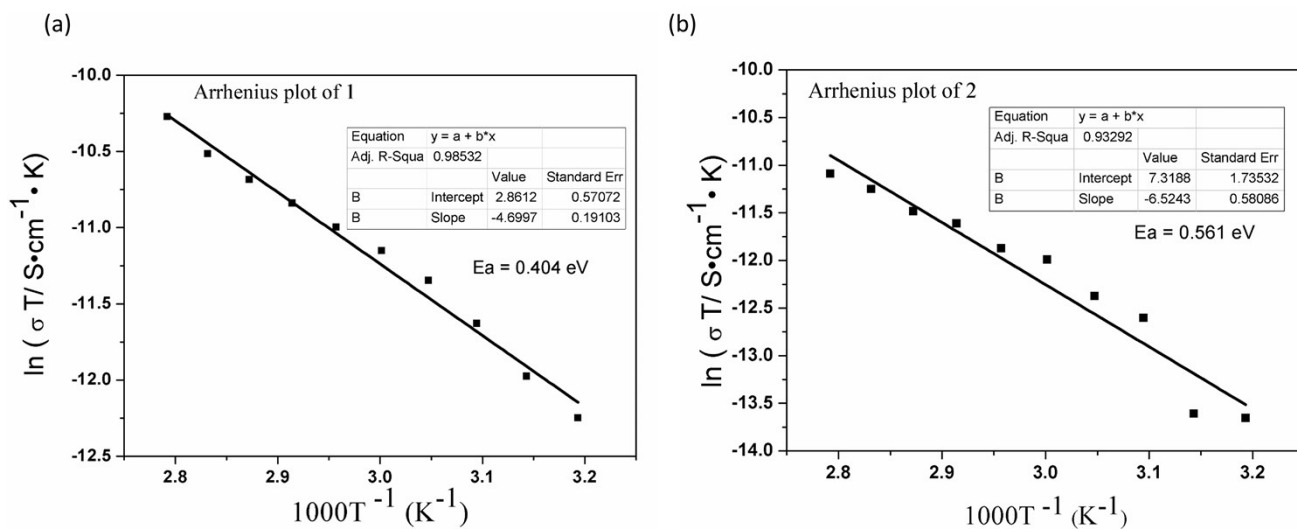

**Figure S5.** Arrhenius plots of **1** (upper) and **2** (bottom) under 98 % RH.

## References

1. Chen, C.-Y.; Cheng, P.-Y.; Wu, H.-H.; Lee, H. M., Conformational Effect of 2,6-Bis(imidazol-1-yl)pyridine on the Self-Assembly of 1D Coordination Chains: Spontaneous Resolution, Supramolecular Isomerism, and Structural Transformation. *Inorg. Chem.* **2007**, *46* (14), 5691-5699.
2. Bruker *APEX and SAINT*, Bruker AXS Inc., Madison, Wisconsin, USA.: 2012.
3. Sheldrick, G. M. *SADABS*, University of Göttingen, Germany: 2003.
4. Sheldrick, G. *SHELXL*, University of Göttingen, Germany: 2015.
